# Supplementary material for: Generation of particle assemblies mimicking enzymatic activity by processing of herbal food: the case of rhizoma polygonati and other natural ingredients in traditional Chinese medicine
Source: PubMed Central journal article supplement — Nanoscale Adv. 2021 Jan 13;3(8):2222–35. doi: 10.1039/d0na00958j (PMC9417895; doi:10.1039/d0na00958j), 2021-01-13
Supplement: NA-003-D0NA00958J-s001.pdf [file NA-003-D0NA00958J-s001.pdf]

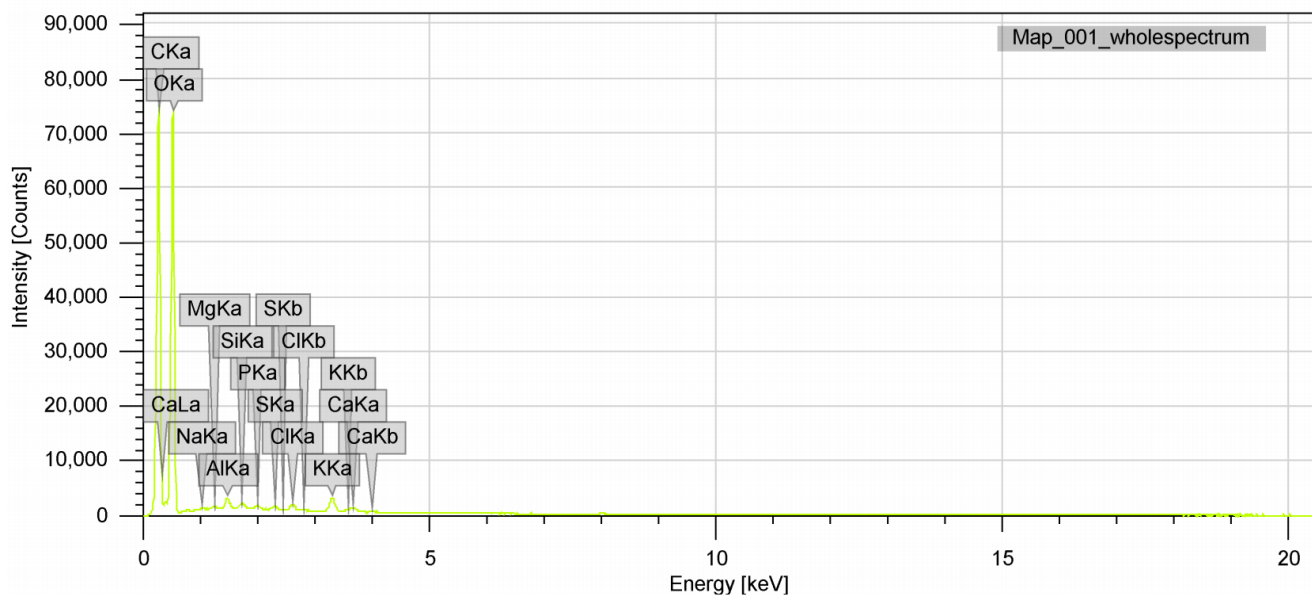

| Element               | Line | Mass%                | Atom%        |
|-----------------------|------|----------------------|--------------|
| C                     | K    | 44.52 ± 0.03         | 52.19 ± 0.04 |
| O                     | K    | 53.24 ± 0.08         | 46.85 ± 0.07 |
| Na                    | K    | 0.11 ± 0.01          | 0.07 ± 0.00  |
| Mg                    | K    | 0.10 ± 0.00          | 0.06 ± 0.00  |
| Al                    | K    | 0.33 ± 0.01          | 0.17 ± 0.00  |
| Si                    | K    | 0.14 ± 0.00          | 0.07 ± 0.00  |
| P                     | K    | 0.15 ± 0.00          | 0.07 ± 0.00  |
| S                     | K    | 0.16 ± 0.00          | 0.07 ± 0.00  |
| Cl                    | K    | 0.25 ± 0.00          | 0.10 ± 0.00  |
| K                     | K    | 0.77 ± 0.01          | 0.28 ± 0.00  |
| Ca                    | K    | 0.23 ± 0.00          | 0.08 ± 0.00  |
| Total                 |      | 100.00               | 100.00       |
| Map_001_wholespectrum |      | Fitting ratio 0.0057 |              |

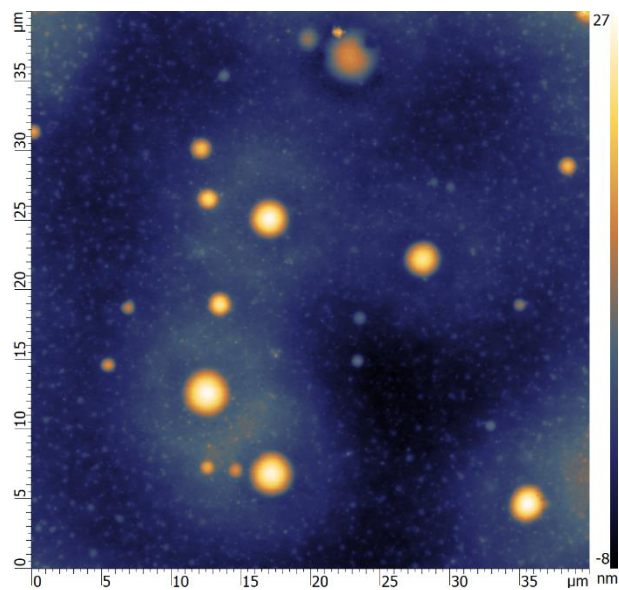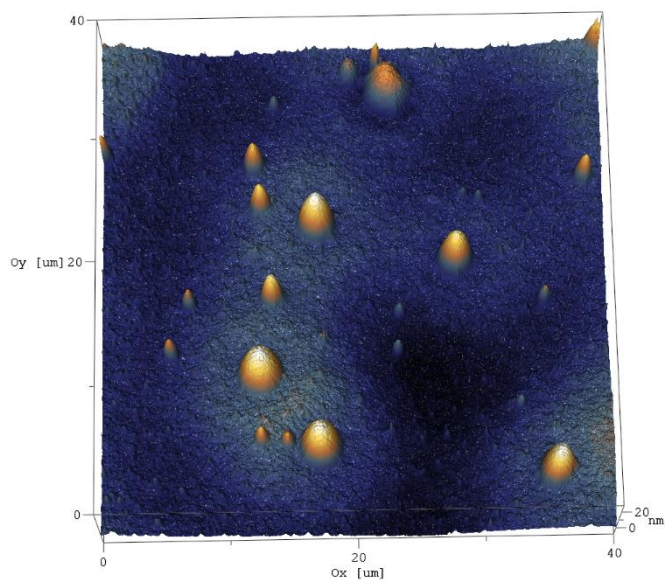

AFM images for fresh RP

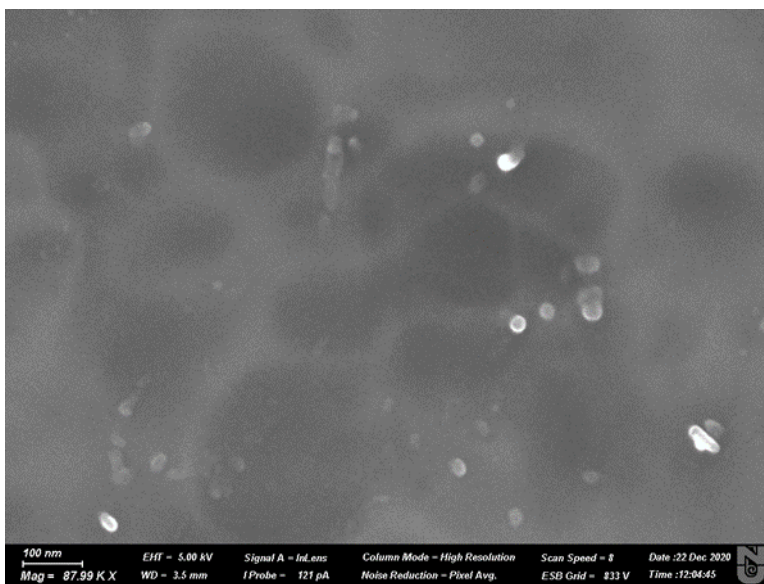

a. SEM image of RP nano

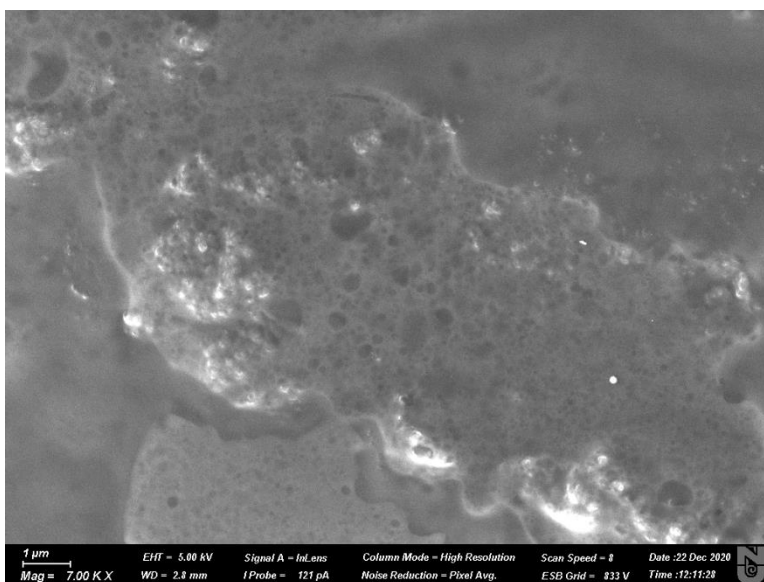

b. SEM image of RP micro

Relative activity / %

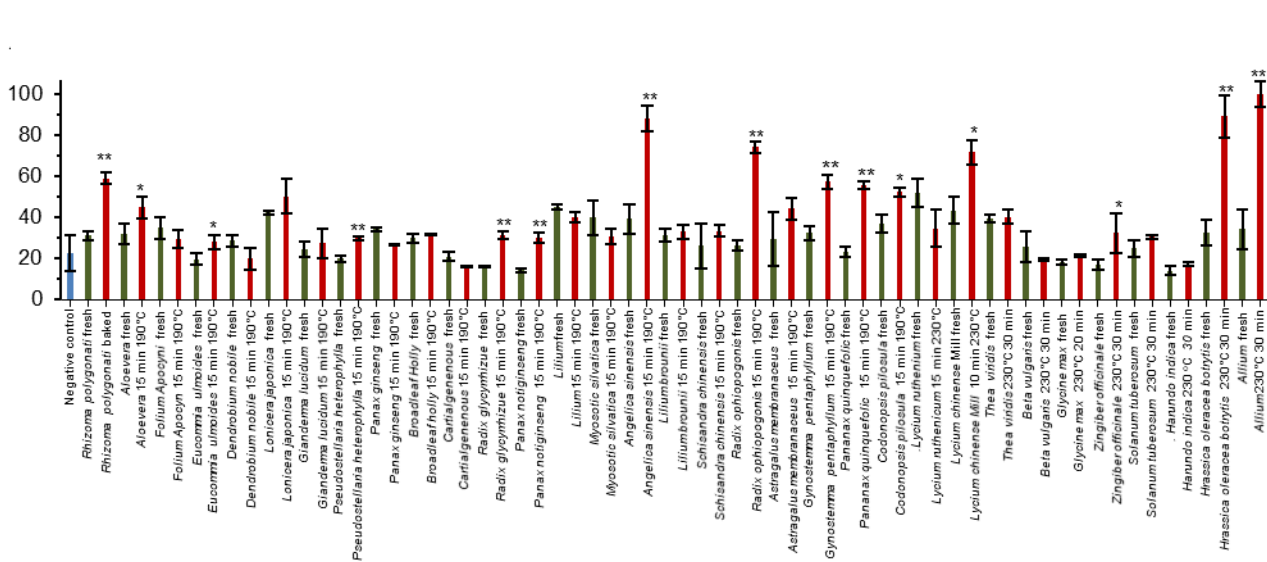

PL activity tests of 33 herbal species with NBT/BCIP substrate at pH 13 (the concentration of herbs: 2.5 mg/mL);

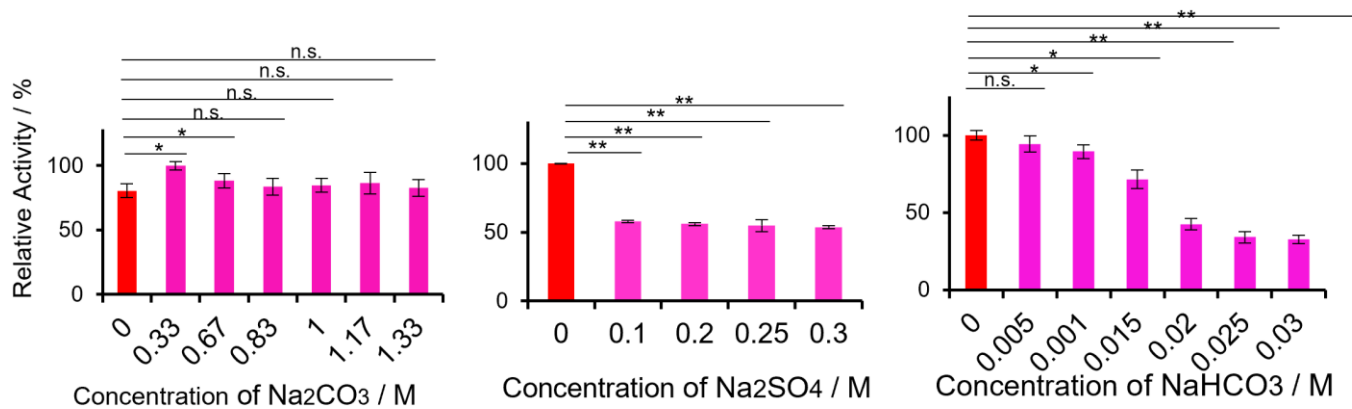

Chemical effect on RP phosphatase activity

RP binds DNA

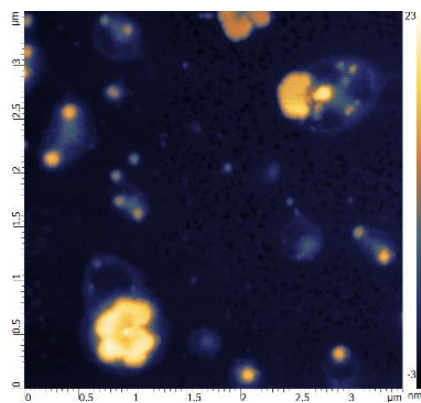

Images of RP binds DNA, supplementary to Fig. 6c.
